# Supplementary material for: Increased Ileal Immunoglobulin A Production and Immunoglobulin A-Coated Bacteria in Diarrhea-Predominant Irritable Bowel Syndrome
Source: PubMed Central journal article supplement — Clin Transl Gastroenterol. 2020 Mar 4;11(3):e00146. doi: 10.14309/ctg.0000000000000146 (PMC7145038; doi:10.14309/ctg.0000000000000146), 2020-03-04
Supplement: ct9-11-e00146-s003.pdf [file ct9-11-e00146-s003.pdf]

**Supplementary table 2** Correlation between clinical parameters and biological markers of IgA activity (IgA in blood, IGHA1, IGHA2 and AID expression in cecum mucosa and blood) in H and IBS-D participants.

|                       | Bowel movements |             | Stool form     |             | Abdominal pain severity |             | Abdominal pain frequency |             | IBS-SSS        |             | HADS-A         |             | HADS-D         |             |
|-----------------------|-----------------|-------------|----------------|-------------|-------------------------|-------------|--------------------------|-------------|----------------|-------------|----------------|-------------|----------------|-------------|
|                       | r <sub>s</sub>  | p Value     | r <sub>s</sub> | p Value     | r <sub>s</sub>          | p Value     | r <sub>s</sub>           | p Value     | r <sub>s</sub> | p Value     | r <sub>s</sub> | p Value     | r <sub>s</sub> | p Value     |
| IgA in blood          | H(n=29)         | IBS-D(n=39) | H(n=29)        | IBS-D(n=39) | H(n=30)                 | IBS-D(n=39) | H(n=30)                  | IBS-D(n=39) | H(n=30)        | IBS-D(n=38) | H(n=29)        | IBS-D(n=39) | H(n=29)        | IBS-D(n=39) |
|                       | 0.1250          | 0.3098      | 0.2005         | 0.1012      | 0.1318                  | 0.2803      | 0.2266                   | 0.0618      | 0.1158         | 0.3469      | 0.04608        | 0.7090      | 0.1129         | 0.3595      |
| Cecum gene expression | H(n=15)         | IBS-D(n=15) | H(n=15)        | IBS-D(n=15) | H(n=15)                 | IBS-D(n=15) | H(n=15)                  | IBS-D(n=15) | H(n=15)        | IBS-D(n=14) | H(n=15)        | IBS-D(n=15) | H(n=15)        | IBS-D(n=15) |
| IGHA1                 | -0.1398         | 0.4612      | -0.1691        | 0.3716      | -0.1198                 | 0.5284      | 0.03864                  | 0.8393      | -0.05046       | 0.7949      | 0.06105        | 0.7486      | -0.2064        | 0.2738      |
| IGHA2                 | 0.1255          | 0.5087      | 0.1501         | 0.4286      | 0.05653                 | 0.7667      | -0.04508                 | 0.8130      | 0.06985        | 0.7188      | -0.03962       | 0.8353      | 0.2666         | 0.1544      |
| AID                   | -0.1207         | 0.5254      | -0.04728       | 0.8040      | -0.01852                | 0.9226      | 0.1510                   | 0.4258      | 0.04807        | 0.8044      | 0.02442        | 0.8981      | -0.1812        | 0.3379      |
| Blood gene expression | H(n=26-28)      | IBS-D(n=38) | H(n=26-28)     | IBS-D(n=38) | H(n=27-29)              | IBS-D(n=38) | H(n=27-29)               | IBS-D(n=38) | H(n=27-29)     | IBS-D(n=37) | H(n=27-29)     | IBS-D(n=38) | H(n=27-29)     | IBS-D(n=38) |
| IGHA1                 | -0.1386         | 0.2747      | -0.1656        | 0.1909      | -0.04186                | 0.7406      | -0.05870                 | 0.6423      | -0.02758       | 0.8287      | 0.02104        | 0.8679      | -0.1360        | 0.2799      |
| IGHA2                 | 0.1267          | 0.3105      | -0.01765       | 0.8881      | 0.05341                 | 0.6678      | -0.04707                 | 0.7053      | 0.01940        | 0.8771      | -0.1857        | 0.1354      | -0.2016        | 0.1046      |
| AID                   | -0.02257        | 0.8595      | -0.1015        | 0.4247      | -0.09368                | 0.4579      | -0.04932                 | 0.6964      | -0.04446       | 0.7272      | 0.03153        | 0.8031      | -0.1110        | 0.3786      |

AID, activation-induced cytidine deaminase; IGHA1, heavy chain of the immunoglobulin A1; IGHA2, heavy chain of the immunoglobulin A2; H, healthy controls; IBS, irritable bowel syndrome; IBS-D, diarrhoea-predominant IBS; IBS-SSS, IBS symptom severity scale. \* p < 0.05, \*\* p < 0.01, \*\*\* p < 0.001.
